# Supplementary material for: Factors influencing the effectiveness of public health emergency preparedness: a cross-sectional study from China
Source: Research Square preprint supplement (doi:10.21203/rs.3.rs-3120304/v1), 2023-07-17
Supplement: Supplementary file 1 [file 0b58b802e54f47b9777b0792.docx]

**Highlights**

- This is a study of public health emergency workers’ perceived systems preparedness in a developing country (China).
- Stratified cluster sampling was used to choose 1859 public health emergency workers from 40 CDCs in Heilongjiang Province in northeast China.
- This study demonstrates the importance of scenario-based training to enhance disaster preparedness.
- The perceptions of the effectiveness of emergency drills in public health emergency response may have been overestimated owing to the use of self-assessment tools.
- The number of CDC staff is determined by the size of population a CDC serves. Therefore, there might have been an aggregation effect in the case of some CDCs serving a large population.
